# Supplementary material
Source: MDPI journal article supplement (https://www.mdpi.com/2075-4701/5/3/1328)
Supplement: s1 [file s1]

**Supplementary Material**

**Table S1.** Concentrations of major ions present in the acidic process water used for
leaching experiments a.

| **Process Water** | **Cl−** | **SO42−** | **PO43−** | **Br−** | **Mn2+** | **Cu2+** | **Pb2+** | **Zn2+** | **Al3+** |
| --- | --- | --- | --- | --- | --- | --- | --- | --- | --- |
| (mg/L) | | | | | | | | | |
| Concentrations | 45,000 | 11 | 10 | 4 | 4 | 3 | 10 | 53 | 21 |

a All other analysed ions (Acetate, NO2−, NO3−, NH4+, Na, K, Mg, As, Ba, Be, Cd, Co, Cr, Li, Mo, Ni, Se, Ag, Sr, Tl, U and V) were detected in amounts of <1.0mg/L.

**Table S2.** ANOVA on the leachate Cu concentration in the one-step leaching
experiments on the bark-ash sample A1a at varying L/S ratios and leaching times with a95% confidence interval.

| **Parameter** | **SS a** | **Df b** | **MS c** | **F0 d** | ***p*-Value e** |
| --- | --- | --- | --- | --- | --- |
| Leaching time | 480 | 2 | 240 | 0.60 | 0.56 |
| L/S | 14,900 | 1 | 14,900 | 37 | <0.05 |
| Interaction | 980 | 2 | 490 | 1.2 | 0.33 |
| Error | 4800 | 12 | 400 | - | - |
| Total | 21,200 | 17 | - | - | - |

a SS = sum of squares; b Df = degrees of freedom; c MS = mean square; d F0 = MS*x*/MSerror;
e *p*-value = probability distribution of F0.

**Table S3.** ANOVA on the leachate Cu concentrations of the two-step leaching experiments on the bark-ash sample A1a using L/S = 10 and different leaching times. The confidence interval was 95%*.*

| **Parameter** | **SS** | **Df** | **MS** | **F0** | ***p*-Value** |
| --- | --- | --- | --- | --- | --- |
| Leaching time | 330 | 2 | 170 | 0.22 | 0.80 |
| Error | 220 | 3 | 750 | - | - |
| Total | 2600 | 5 | - | - | - |

**Table S4.** ANOVA of the leachate concentrations in the one-step leaching experiments on the A2 soil sample at varying L/S ratios and leaching times with a 95% confidence interval.

| **Parameter** | **SS** | **Df** | **MS** | **F0** | ***p*-Value** |
| --- | --- | --- | --- | --- | --- |
| Leaching time | 67,000 | 2 | 34,000 | 1.3 | 0.32 |
| L/S | 1,400,000 | 2 | 680,000 | 26 | <0.05 |
| Interaction | 280,000 | 4 | 69,000 | 2.6 | 0.07 |
| Error | 480,000 | 18 | 26,000 | - | - |
| Total | 2,200,000 | 26 | - | - | - |
